# Supplementary material
Source: PubMed Central journal article supplement (PMC3389150)
Supplement: NIHMS366508-supplement-01.pdf [file NIHMS366508-supplement-01.pdf]

### Supplementary Tables

The four tables included in this supplement are intended to provide complete information on the hierarchical factor structure associated with the Personality Inventory for DSM-5

Supplementary Table 1. *Descriptive Statistics and Reliability for the PID5 Scales*

|                          | Min | Max  | M    | SD  | Skew | Kurt | $\alpha$ | $\omega$ |
|--------------------------|-----|------|------|-----|------|------|----------|----------|
| Submissiveness           | .00 | 3.00 | 1.26 | .66 | -.05 | -.58 | .79      | .75      |
| Depressivity             | .00 | 3.00 | .55  | .57 | 1.29 | 1.18 | .93      | .86      |
| Separation Insecurity    | .00 | 3.00 | 1.08 | .66 | .35  | -.48 | .83      | .74      |
| Perseveration            | .00 | 2.78 | 1.04 | .58 | .07  | -.63 | .85      | .72      |
| Anxiousness              | .00 | 3.00 | 1.39 | .71 | .17  | -.74 | .90      | .77      |
| Emotional Lability       | .00 | 3.00 | 1.11 | .71 | .42  | -.51 | .88      | .73      |
| Suspiciousness           | .00 | 3.00 | .99  | .53 | .42  | -.04 | .72      | .67      |
| Restricted Affectivity   | .00 | 3.00 | .93  | .65 | .62  | -.16 | .84      | .77      |
| Withdrawal               | .00 | 3.00 | .74  | .59 | .74  | -.04 | .89      | .76      |
| Intimacy Avoidance       | .00 | 2.83 | .53  | .57 | 1.13 | .78  | .82      | .78      |
| Anhedonia                | .00 | 3.00 | .72  | .59 | 1.02 | .73  | .88      | .80      |
| Manipulativeness         | .00 | 3.00 | 1.11 | .69 | .26  | -.56 | .84      | .74      |
| Deceitfulness            | .00 | 2.80 | .85  | .58 | .47  | -.46 | .87      | .78      |
| Hostility                | .00 | 2.90 | 1.03 | .57 | .37  | -.33 | .85      | .73      |
| Callousness              | .00 | 2.50 | .46  | .45 | 1.28 | 1.23 | .88      | .76      |
| Attention Seeking        | .00 | 3.00 | 1.22 | .66 | .07  | -.66 | .89      | .71      |
| Grandiosity              | .00 | 3.00 | .82  | .59 | .64  | -.10 | .80      | .75      |
| Irresponsibility         | .00 | 2.57 | .52  | .48 | .99  | .50  | .77      | .70      |
| Impulsivity              | .00 | 3.00 | .94  | .65 | .42  | -.37 | .86      | .81      |
| Distractibility          | .00 | 3.00 | 1.13 | .67 | .21  | -.57 | .90      | .84      |
| Rigid Perfectionism      | .00 | 3.00 | 1.12 | .65 | .28  | -.43 | .90      | .81      |
| Risk Taking              | .00 | 3.00 | 1.42 | .52 | .12  | .06  | .88      | .60      |
| Eccentricity             | .00 | 3.00 | 1.06 | .76 | .38  | -.71 | .96      | .89      |
| Perceptual Dysregulation | .00 | 2.75 | .65  | .50 | .77  | .01  | .85      | .71      |
| Unusual Beliefs          | .00 | 3.00 | .66  | .57 | .82  | .04  | .82      | .70      |

Note. N = 2461.  $\alpha$  = Cronbach's Alpha;  $\omega$  = McDonald's Omega Hierarchical.

Supplementary Table 2. *One-Factor and Orthogonal Two-Factor Exploratory Models*

| Facet                    | 1-Factor Model |          | 2-Factor Model |              |          |
|--------------------------|----------------|----------|----------------|--------------|----------|
|                          | I              | Residual | I              | II           | Residual |
| Submissiveness           | 0.349          | 0.878    | 0.358          | 0.090        | 0.864    |
| Depressivity             | <b>0.744</b>   | 0.447    | <b>0.871</b>   | 0.083        | 0.235    |
| Separation Insecurity    | <b>0.482</b>   | 0.768    | <b>0.467</b>   | 0.163        | 0.756    |
| Perseveration            | <b>0.789</b>   | 0.377    | <b>0.696</b>   | 0.339        | 0.401    |
| Anxiousness              | <b>0.615</b>   | 0.622    | <b>0.691</b>   | 0.061        | 0.519    |
| Emotional Lability       | <b>0.581</b>   | 0.663    | <b>0.572</b>   | 0.162        | 0.647    |
| Suspiciousness           | <b>0.667</b>   | 0.556    | <b>0.603</b>   | 0.304        | 0.544    |
| Restricted Affectivity   | <b>0.431</b>   | 0.814    | 0.339          | 0.289        | 0.802    |
| Withdrawal               | <b>0.640</b>   | 0.590    | <b>0.693</b>   | 0.136        | 0.502    |
| Intimacy Avoidance       | <b>0.443</b>   | 0.804    | <b>0.429</b>   | 0.165        | 0.789    |
| Anhedonia                | <b>0.665</b>   | 0.557    | <b>0.834</b>   | 0.004        | 0.304    |
| Manipulativeness         | <b>0.469</b>   | 0.780    | 0.069          | <b>0.802</b> | 0.352    |
| Deceitfulness            | <b>0.661</b>   | 0.563    | 0.326          | <b>0.767</b> | 0.305    |
| Hostility                | <b>0.665</b>   | 0.558    | <b>0.487</b>   | <b>0.477</b> | 0.535    |
| Callousness              | <b>0.615</b>   | 0.622    | 0.378          | <b>0.590</b> | 0.509    |
| Attention Seeking        | 0.350          | 0.878    | 0.009          | <b>0.630</b> | 0.604    |
| Grandiosity              | 0.387          | 0.850    | 0.054          | <b>0.644</b> | 0.582    |
| Irresponsibility         | <b>0.690</b>   | 0.523    | <b>0.534</b>   | <b>0.461</b> | 0.503    |
| Impulsivity              | <b>0.518</b>   | 0.732    | 0.274          | <b>0.508</b> | 0.667    |
| Distractibility          | <b>0.708</b>   | 0.499    | <b>0.619</b>   | 0.317        | 0.516    |
| Rigid Perfectionism      | <b>0.405</b>   | 0.836    | 0.328          | 0.214        | 0.846    |
| Risk Taking              | 0.206          | 0.958    | -0.082         | <b>0.496</b> | 0.747    |
| Eccentricity             | <b>0.697</b>   | 0.514    | <b>0.547</b>   | <b>0.396</b> | 0.544    |
| Perceptual Disregulation | <b>0.824</b>   | 0.322    | <b>0.660</b>   | <b>0.457</b> | 0.356    |
| Unusual Beliefs          | <b>0.655</b>   | 0.571    | <b>0.441</b>   | <b>0.484</b> | 0.571    |

Note. N = 2461. Factor loadings of  $|\geq .40|$  and above are bolded.

Supplementary Table 3. *Three- and Four-Factor Orthogonal Exploratory Models*

| Facet                    | Three-Factor Model |              |              |          | Four-Factor Model |              |              |              |          |
|--------------------------|--------------------|--------------|--------------|----------|-------------------|--------------|--------------|--------------|----------|
|                          | I                  | II           | III          | Residual | I                 | II           | III          | IV           | Residual |
| Submissiveness           | 0.119              | <b>0.398</b> | 0.071        | 0.823    | 0.131             | <b>0.406</b> | 0.079        | 0.010        | 0.812    |
| Depressivity             | <b>0.636</b>       | <b>0.580</b> | 0.054        | 0.257    | <b>0.651</b>      | <b>0.533</b> | -0.006       | 0.200        | 0.252    |
| Separation Insecurity    | 0.040              | <b>0.636</b> | 0.139        | 0.574    | 0.057             | <b>0.632</b> | 0.122        | 0.096        | 0.573    |
| Perseveration            | 0.346              | <b>0.668</b> | 0.306        | 0.341    | 0.358             | <b>0.649</b> | 0.240        | 0.246        | 0.333    |
| Anxiousness              | 0.259              | <b>0.751</b> | 0.012        | 0.369    | 0.277             | <b>0.775</b> | 0.056        | -0.044       | 0.318    |
| Emotional Lability       | 0.040              | <b>0.808</b> | 0.120        | 0.331    | 0.068             | <b>0.793</b> | 0.098        | 0.122        | 0.343    |
| Suspiciousness           | <b>0.448</b>       | <b>0.427</b> | 0.275        | 0.542    | <b>0.455</b>      | <b>0.415</b> | 0.279        | 0.100        | 0.533    |
| Restricted Affectivity   | <b>0.662</b>       | -0.156       | 0.286        | 0.456    | <b>0.643</b>      | -0.168       | 0.278        | 0.103        | 0.470    |
| Withdrawal               | <b>0.800</b>       | 0.227        | 0.095        | 0.300    | <b>0.813</b>      | 0.217        | 0.154        | -0.049       | 0.266    |
| Intimacy Avoidance       | <b>0.582</b>       | 0.043        | 0.149        | 0.637    | <b>0.580</b>      | 0.023        | 0.137        | 0.085        | 0.637    |
| Anhedonia                | <b>0.731</b>       | <b>0.449</b> | -0.032       | 0.263    | <b>0.744</b>      | <b>0.414</b> | -0.036       | 0.064        | 0.270    |
| Manipulativeness         | 0.087              | 0.073        | <b>0.785</b> | 0.371    | 0.069             | 0.081        | <b>0.789</b> | 0.193        | 0.328    |
| Deceitfulness            | 0.289              | 0.220        | <b>0.748</b> | 0.309    | 0.281             | 0.206        | <b>0.704</b> | 0.277        | 0.306    |
| Hostility                | 0.299              | <b>0.439</b> | <b>0.450</b> | 0.516    | 0.301             | <b>0.436</b> | <b>0.459</b> | 0.137        | 0.489    |
| Callousness              | <b>0.514</b>       | 0.058        | <b>0.586</b> | 0.388    | <b>0.506</b>      | 0.037        | <b>0.581</b> | 0.183        | 0.371    |
| Attention Seeking        | -0.228             | 0.264        | <b>0.646</b> | 0.461    | -0.232            | 0.257        | <b>0.571</b> | 0.295        | 0.466    |
| Grandiosity              | 0.116              | 0.013        | <b>0.640</b> | 0.577    | 0.105             | 0.034        | <b>0.709</b> | 0.027        | 0.484    |
| Irresponsibility         | <b>0.449</b>       | 0.316        | <b>0.447</b> | 0.499    | <b>0.454</b>      | 0.252        | 0.299        | <b>0.440</b> | 0.447    |
| Impulsivity              | 0.126              | 0.268        | <b>0.509</b> | 0.653    | 0.110             | 0.173        | 0.234        | <b>0.770</b> | 0.310    |
| Distractibility          | 0.336              | <b>0.543</b> | 0.296        | 0.504    | 0.345             | <b>0.487</b> | 0.108        | <b>0.491</b> | 0.392    |
| Rigid Perfectionism      | 0.102              | <b>0.407</b> | 0.185        | 0.790    | 0.104             | <b>0.467</b> | 0.323        | -0.207       | 0.624    |
| Risk Taking              | -0.049             | -0.063       | <b>0.514</b> | 0.729    | -0.076            | -0.147       | 0.289        | <b>0.640</b> | 0.479    |
| Eccentricity             | 0.355              | <b>0.435</b> | 0.375        | 0.544    | 0.363             | 0.389        | 0.247        | 0.372        | 0.517    |
| Perceptual Disregulation | <b>0.453</b>       | <b>0.499</b> | <b>0.429</b> | 0.362    | <b>0.461</b>      | <b>0.451</b> | 0.312        | 0.371        | 0.349    |
| Unusual Beliefs          | 0.342              | 0.306        | <b>0.464</b> | 0.574    | 0.343             | 0.274        | 0.388        | 0.280        | 0.578    |

Note. N = 2461. Factor loadings of  $|\geq 0.40|$  and above are bolded.

Supplementary Table 4. *Five-Factor Orthogonal Exploratory Model*

| Facet                    | I            | II           | III          | IV           | V            | Residual |
|--------------------------|--------------|--------------|--------------|--------------|--------------|----------|
| Submissiveness           | 0.172        | 0.394        | 0.097        | 0.008        | 0.021        | 0.805    |
| Depressivity             | <b>0.738</b> | <b>0.459</b> | 0.039        | 0.203        | 0.092        | 0.193    |
| Separation Insecurity    | 0.143        | <b>0.634</b> | 0.143        | 0.112        | -0.004       | 0.545    |
| Perseveration            | 0.348        | <b>0.582</b> | 0.215        | 0.157        | <b>0.396</b> | 0.313    |
| Anxiousness              | 0.338        | <b>0.734</b> | 0.055        | -0.071       | 0.142        | 0.319    |
| Emotional Lability       | 0.140        | <b>0.768</b> | 0.085        | 0.108        | 0.155        | 0.347    |
| Suspiciousness           | <b>0.459</b> | 0.351        | 0.284        | 0.051        | 0.219        | 0.535    |
| Restricted Affectivity   | <b>0.545</b> | -0.254       | 0.278        | 0.007        | 0.303        | 0.468    |
| Withdrawal               | <b>0.766</b> | 0.108        | 0.159        | -0.129       | 0.294        | 0.273    |
| Intimacy Avoidance       | <b>0.521</b> | -0.059       | 0.140        | 0.015        | 0.261        | 0.637    |
| Anhedonia                | <b>0.829</b> | 0.330        | 0.016        | 0.064        | 0.046        | 0.198    |
| Manipulativeness         | 0.032        | 0.079        | <b>0.804</b> | 0.138        | 0.132        | 0.310    |
| Deceitfulness            | 0.277        | 0.180        | <b>0.758</b> | 0.242        | 0.109        | 0.246    |
| Hostility                | 0.314        | 0.401        | <b>0.476</b> | 0.084        | 0.150        | 0.484    |
| Callousness              | <b>0.472</b> | -0.020       | <b>0.611</b> | 0.129        | 0.169        | 0.358    |
| Attention Seeking        | -0.222       | 0.286        | <b>0.561</b> | 0.274        | 0.086        | 0.471    |
| Grandiosity              | 0.034        | 0.015        | <b>0.668</b> | -0.046       | 0.241        | 0.493    |
| Irresponsibility         | <b>0.468</b> | 0.193        | 0.347        | <b>0.418</b> | 0.163        | 0.421    |
| Impulsivity              | 0.111        | 0.150        | 0.273        | <b>0.704</b> | 0.204        | 0.353    |
| Distractibility          | 0.362        | <b>0.426</b> | 0.128        | <b>0.439</b> | 0.267        | 0.406    |
| Rigid Perfectionism      | 0.062        | <b>0.445</b> | 0.258        | -0.312       | 0.309        | 0.539    |
| Risk Taking              | -0.107       | -0.143       | 0.306        | <b>0.592</b> | 0.146        | 0.502    |
| Eccentricity             | 0.302        | 0.303        | 0.192        | 0.281        | <b>0.526</b> | 0.424    |
| Perceptual Disregulation | <b>0.399</b> | 0.349        | 0.250        | 0.277        | <b>0.605</b> | 0.214    |
| Unusual Beliefs          | 0.236        | 0.176        | 0.297        | 0.163        | <b>0.662</b> | 0.360    |

Note. N = 2461. Factor loadings of  $|\geq .40|$  and above are bolded.
